# Supplementary material for: Synergistic antitumor activity of a DLL4/VEGF bispecific therapeutic antibody in combination with irinotecan in gastric cancer
Source: PubMed Central journal article supplement — BMB Rep. 2020 Oct 31;53(10):533–8. doi: 10.5483/BMBRep.2020.53.10.103 (PMC7607148; doi:10.5483/bmbrep.2020.53.10.103), 2020-10-31
Supplement: BMB-53-533_Supple.pdf [file BMB-53-533_Supple.pdf]

# Synergistic antitumor activity of a DLL4/VEGF bispecific therapeutic antibody in combination with irinotecan in gastric cancer

**Author's name:** Da-Hyun Kim<sup>1,2</sup>, Seul Lee<sup>1</sup>, Hyeok Gu Kang<sup>1,2</sup>, Hyun-Woo Park<sup>3</sup>, Han-Woong Lee<sup>3</sup>, Dongin Kim<sup>4</sup>, Dong-Hoon Yoem<sup>4</sup>, Jin-Hyung Ahn<sup>4</sup>, Eunsin Ha<sup>4,7</sup>, Weon-Kyoo You<sup>4</sup>, Sang Hoon Lee<sup>4</sup>, Seok-Jun Kim<sup>5,6,\*</sup> & Kyung-Hee Chun<sup>1,2,\*</sup>

**Affiliation:** <sup>1</sup>Department of Biochemistry & Molecular Biology, Yonsei University College of Medicine, <sup>2</sup>Brain Korea 21 Plus Project for Medical Science, Yonsei University College of Medicine, <sup>3</sup>Department of Biochemistry, College of Life Science, Yonsei University, Seoul 03722, <sup>4</sup>R&D center, ABL Bio Inc., Seongnam 13488, <sup>5</sup>Department of Biomedical Science, College of Natural Science, Chosun University, <sup>6</sup>Brain Korea 21 Plus Research Team for Bioactive Control Technology, College of Natural Sciences, Chosun University, Gwangju 61452, <sup>7</sup>National OncoVenture, National Cancer Center, Goyang 10408, Korea

**Running title:** Synergistic antitumor effect of ABL001/irinotecan

**\*Corresponding authors:** Seok-Jun Kim, PhD, Department of Biomedical Science, Brain Korea 21 Plus Research Team for Bioactive Control Technology, College of Natural Sciences, Chosun University, 309 Pilmun-daero, Dong-gu, 61452 Gwangju, Korea. Tel: 82-62-230-6664, Fax: 82-62-234-4326, E-mail: heaven1472@chosun.ac.kr and Kyung-Hee Chun, PhD, Department of Biochemistry & Molecular Biology, Brain Korea 21 Plus Project for Medical Science, Yonsei University College of Medicine, 50 Yonsei-ro, Seodaemun-gu, 03722 Seoul, Korea. Tel: 82-2-2228-1699, Fax: 82-2-312-5041, E-mail: [khchun@yuhs.ac](mailto:khchun@yuhs.ac)

## **SUPPLEMENTARY METATERIALS AND METHODS**

### **Western blotting**

Cell lysates were prepared as described previously (1). Protein samples were loaded onto a sodium dodecyl sulfate polyacrylamide gel electrophoresis (SDS-PAGE) gel and following electrophoresis, transferred to a polyvinylidene difluoride (PVDF) membrane. The membranes were probed with primary and secondary antibodies and the protein bands were visualized using ECL solution (Amersham Life science, Little Chalfont, UK) using a LAS3000 (Fujifilm, Tokyo, Japan). The FUSION SOLO S (Vilber, Eberhardzell, Germany) was used for image detection according to the manufacturer's instructions. Antibodies used in this study were anti- $\beta$ -actin (Santa Cruz Biotechnology, Dallas, TX, USA), anti-DLL4, and anti-VEGFR2 (Cell Signaling Technology, Danvers, MA, USA).

### **RNA isolation and quantitative RT-PCR**

Total RNA was prepared using RNA-lysis reagent (Intron) following the manufacturer's instructions. cDNA (1  $\mu$ g) was synthesized using quantitative RT-PCR master mix (TOYOBO, Osaka, Japan). qRT-PCR was performed using SYBR Premix Ex Taq (Clontech Laboratories, Mountain View, CA, USA) with ABI instruments (Applied Biosystems Inc, Foster City, CA, USA). All results were normalized to  $\beta$ -actin.

### **Cell proliferation assay**

Cells ( $3 \times 10^3$ /well) were plated in 96-well culture plates. Following incubation for 24 h, the cells were treated with anti-hDLL4 and ABL001 at the indicated concentrations. Following transfection for 72 h, WST assay was performed as described previously (2). The absorbance was measured at 450 nm using an ELISA plate reader.

### **Transwell migration and invasion assays**

Cells were isolated and added ( $2 \times 10^4$  cells/well) to the upper Transwell (Corning, New York, USA) chamber. The membrane (on the upper side) in the top chamber was coated with 0.5 mg/ml collagen type I (BD bioscience, Korea) for the migration assay, while the lower side of the membrane was coated with a 1/15 dilution of Matrigel (BD bioscience, Korea) for the invasion assays. RPMI 1640 supplemented with 10% FBS and 1% antibiotics was added to the lower chamber and the plates were incubated further for 24 h. Cells that migrated or invaded to the lower chamber were quantified following H&E staining by counting five randomly selected areas in each well using wide-field microscopy (3). Data are expressed as mean  $\pm$  standard error of mean (SEM) from three independent experiments.

### **Cell cycle analysis**

Cells were plated in culture plates and treated with anti-hDLL4 and ABL001. The cells were harvested, washed with cold PBS, and then resuspended in 5 ml 70% EtOH overnight at

-20°C. After fixing, the cells were resuspended in a propidium iodide staining solution (containing RNaseA 50 µg/ml, PI 50 µg/ml in PBS). Cell cycle distribution was measured using FACS analysis (4).

### **Apoptosis assay**

Cells were plated in culture plates and treated with anti-hDLL4 and ABL001. After 24 h, the cells were washed and resuspended in FITC Annexin V and 7-AAD solution. Apoptosis was evaluated using FACS analysis following Annexin V staining.

### **Kaplan-Meier analysis**

Kaplan-Meier analysis of survival curve was performed using cBioPortal TCGA database for patients with GC.

## REFERENCES

1. Kang HG, Kim WJ, Kang HG, Chun KH and Kim SJ (2019) Galectin-3 Interacts with C/EBPbeta and Upregulates Hyaluronan-Mediated Motility Receptor Expression in Gastric Cancer. *Mol Cancer Res*
2. Kim SJ, Lee HW, Baek JH et al (2016) Activation of nuclear PTEN by inhibition of Notch signaling induces G2/M cell cycle arrest in gastric cancer. *Oncogene* 35, 251-260
3. Kim SJ, Choi IJ, Cheong TC et al (2010) Galectin-3 increases gastric cancer cell motility by up-regulating fascin-1 expression. *Gastroenterology* 138, 1035-1045 e1031-1032
4. Kim SJ, Lee HW, Gu Kang H et al (2014) Ablation of galectin-3 induces p27(KIP1)-dependent premature senescence without oncogenic stress. *Cell Death Differ* 21, 1769-1779

## SUPPLEMENTARY FIGURES

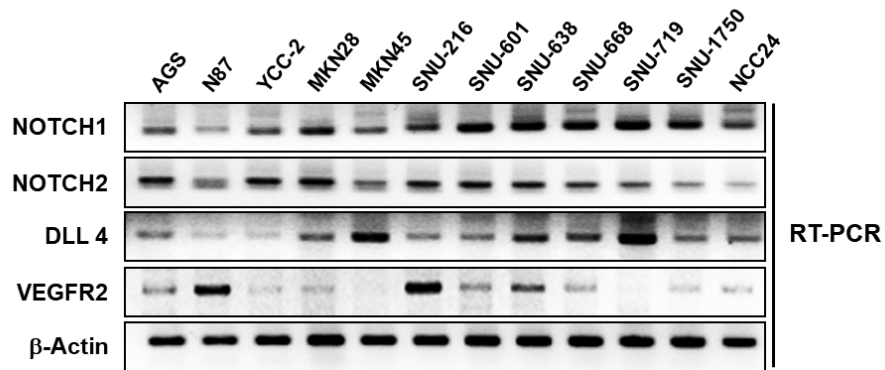

**Supplementary Figure 1. mRNA expression level of Notch related genes and VEGFR2 in the 12 GC cell lines.**

The basal mRNA expression level of Notch related genes, such as Notch 1, Notch 2 and DLL4, and VEGFR2 were evaluated by RT-PCR in twelve human GC cell lines.  $\beta$ -actin was served as the loading control.

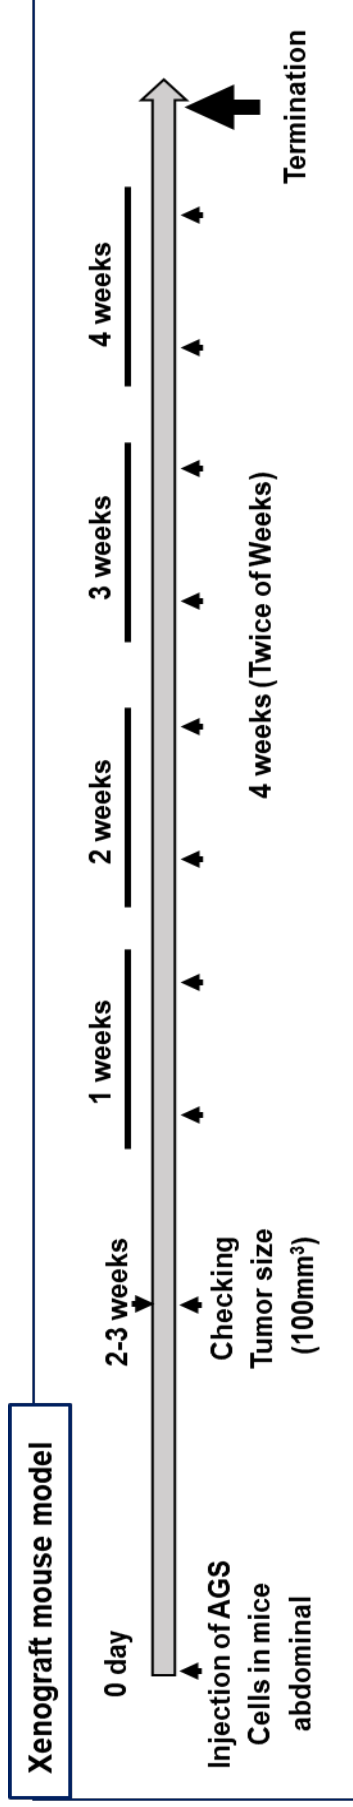

Supplementary Figure 2. A schematic diagram of the *in vivo* xenograft mouse model illustrating the time-line of treatment with mABL001 and

irinotecan

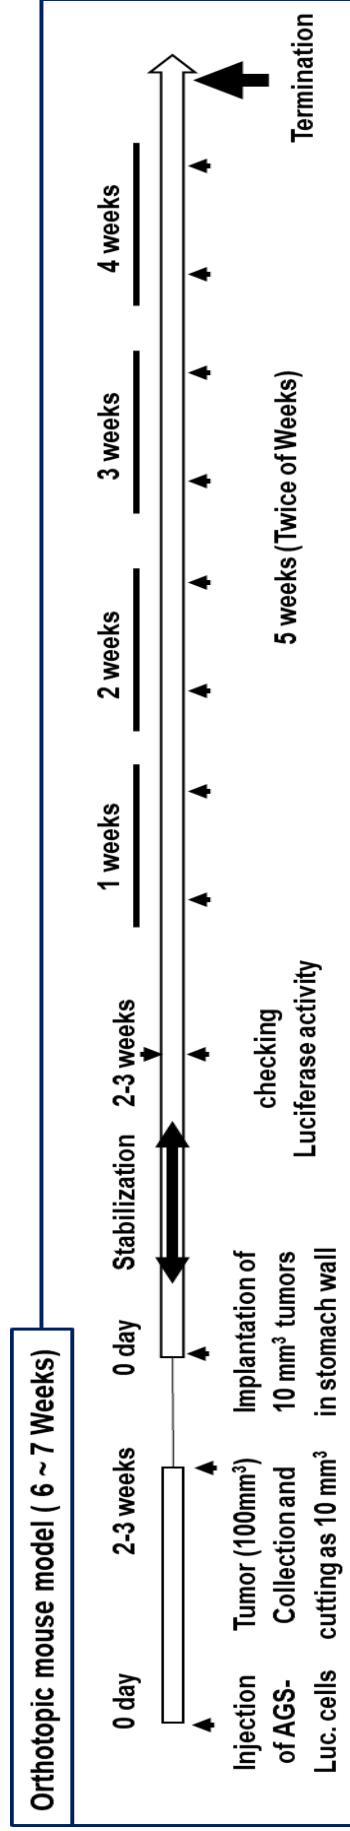

Supplementary Figure 3. A schematic diagram of the *in vivo* orthotopic mouse model illustrating the time-line of tumor implantation and treatment with mABL001 and irinotecan.
